# Supplementary material
Source: PubMed Central journal article supplement (PMC7236083)
Supplement: NIHMS1585080-supplement-Supplemental_Table_1.pdf [file NIHMS1585080-supplement-Supplemental_Table_1.pdf]

**Supplementary Table 1**

| <b>Protein Target</b>   | <b>Dilution</b> | <b>Blocking</b> | <b>Item Number, Company</b> |
|-------------------------|-----------------|-----------------|-----------------------------|
| Progesterone Receptor   | 1:500           | 5% Milk         | sc-7208, SantaCruz          |
| Glucocorticoid Receptor | 1:1000          | 5% BSA          | 12041S, Cell Signaling      |
| $\beta$ -actin          | 1:1000          | 5% Milk         | AC026, Abclonal             |

**Table S1:** Antibodies and conditions used for western blot analysis.
