# Supplementary material
Source: PubMed Central journal article supplement (PMC7236083)
Supplement: NIHMS1585080-supplement-Supplemental_Table_2.pdf [file NIHMS1585080-supplement-Supplemental_Table_2.pdf]

**Supplementary Table 2**

| <b>Primers (Human)</b> | <b>Sequence</b>                |
|------------------------|--------------------------------|
| TRIM22 Forward         | 5'-GCCCTGCAGAGGCTGATAAA-3'     |
| TRIM22 Reverse         | 5'-TGGATATAATTCTTCCAGGCGGT-3'  |
| GILZ Forward           | 5'-TCCGTTAAGCTGGACAACAGT-3'    |
| GILZ Reverse           | 5'-ATGGCCTGTTTCGATCTTGTT-3'    |
| FKBP5 Forward          | 5'-TCCCTCGAATGCAACTCTCT-3'     |
| FKBP5 Reverse          | 5'-GCCACATCTCTGCAGTCAA-3'      |
| 18s Forward            | 5'-GCTTGC GTTGATTAAGTCCC-3'    |
| 18s Reverse            | 5'-GCCTCACTAAACCATCCAATC-3'    |
|                        |                                |
| <b>Primers (Mouse)</b> | <b>Sequence</b>                |
| GILZ Forward           | 5'-CATGGAGGTGGCGGTCTATC-3'     |
| GILZ Reverse           | 5'-CACCTCCTCTCTCACAGCGT-3'     |
| 18s Forward            | 5'-TCAACTTTCGATGGTAGTCGCCGT-3' |
| 18s Reverse            | 5'-TCCTTGGATGTGGTAGCCGTTTCT-3' |

**Table S2:** Primers and sequences of primers used in qPCR analysis.
