# Supplementary material
Source: PubMed Central journal article supplement (PMC7236083)

**A.**

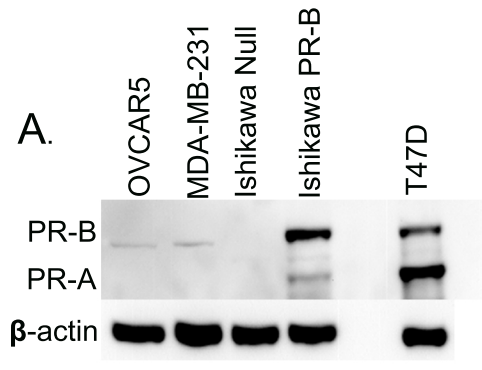

**B.**

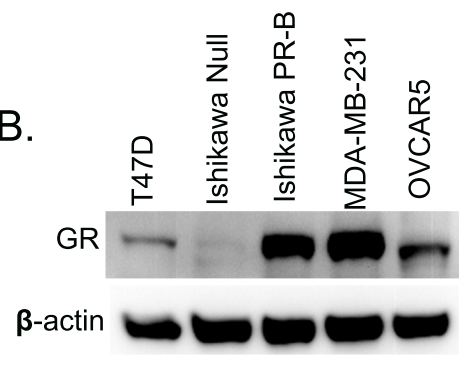

Supplement: NIHMS1585080-supplement-Supplemental_Figure_1.pdf [file NIHMS1585080-supplement-Supplemental_Figure_1.pdf]

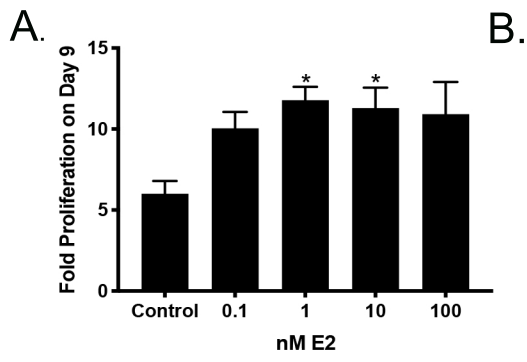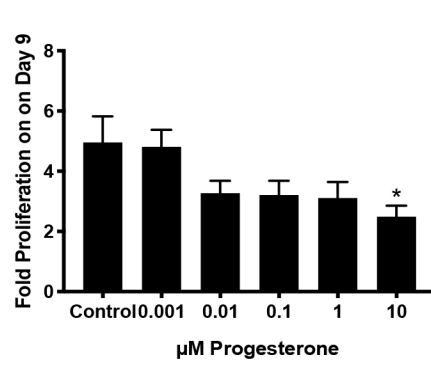

Supplement: NIHMS1585080-supplement-Supplemental_Figure_2.pdf [file NIHMS1585080-supplement-Supplemental_Figure_2.pdf]

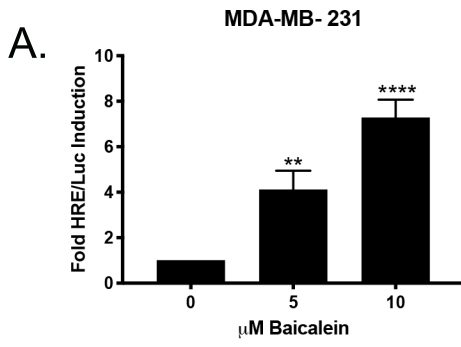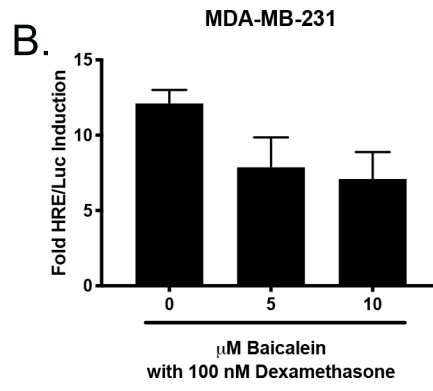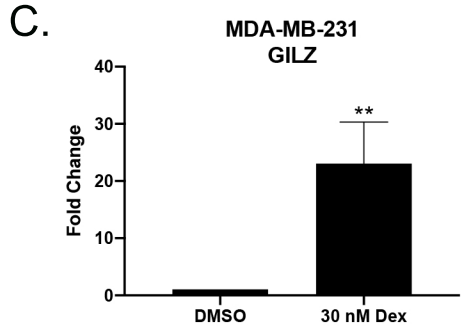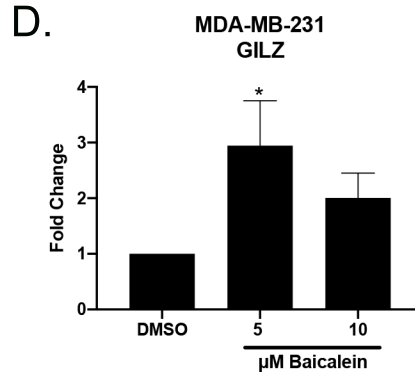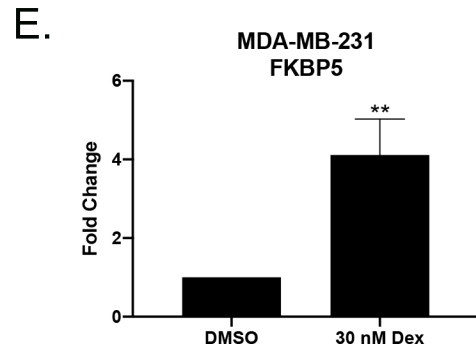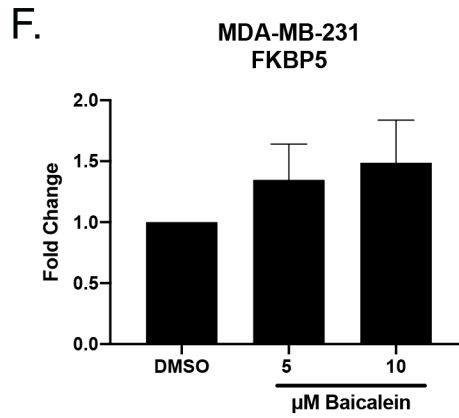

Supplement: NIHMS1585080-supplement-Supplemental_Figure_3.pdf [file NIHMS1585080-supplement-Supplemental_Figure_3.pdf]
